# Supplementary material
Source: Royal Society of Chemistry journal article supplement (doi:10.1039/d6nr00341a)
Supplement: d6nr00341a1.pdf [file d6nr00341a1.pdf]

## 1 **Supporting Information**

### 2 **Materials and Reagents**

3 Zirconium(IV) butoxide in butanol ( $\text{Zr}(\text{BuO})_4 \cdot \text{BuOH}$ , 80% w/w; Sigma Aldrich), dry  
4 benzyl alcohol with a molecular sieve (BnOH; analytical grade, Neon), acetone (99.5%,  
5 Neon), chloroform (99.9%, Synth), ethanol (99,8%, Neon), and a 3.5 Å molecular sieve  
6 (activated at 315 °C for 3 hours; Sigma Aldrich) were used.

### 7 **Synthesis of Nanocrystals**

8 The synthesis of nanocrystals was carried out using a method widely employed in the  
9 literature, with benzyl alcohol as the solvent. Initially, 500 mL of benzyl alcohol was  
10 dried with 110 g of molecular sieves for 2 weeks and stored in a dry environment. In a  
11 glovebox with a dry atmosphere, 9.4 mL of zirconium butoxide precursor in butanol  
12 ( $\text{Zr}(\text{BuO})_4 \cdot \text{BuOH}$ ) was mixed with 30.6 mL of benzyl alcohol (BnOH) previously dried  
13 with a molecular sieve in a glass reaction beaker. The mixture was homogenized and  
14 transferred to a sealed stainless-steel reactor, heated by an electric resistance system  
15 controlled via PID, and subjected to thermal treatment at 230 °C for 48 h under constant  
16 magnetic stirring at 480 RPM. After the reaction, the system was cooled to 50 °C, and the  
17 dispersion was separated by centrifugation and washed twice with acetone. The resulting  
18 solids were collected and stored in chloroform. For analysis of the solid nanomaterials,  
19 the dispersion was dried under a controlled vacuum atmosphere (260 mmHg) at 30 °C.

20 The same process was conducted with the addition of distilled water to a glass vial  
21 previously dried at 110 °C. Deionized water was added to 40 mL of benzyl alcohol  
22 previously dried with a molecular sieve at the concentrations indicated in Table 1 for each  
23 synthesis. After the water was added, the mixture was homogenized, and the sealed vial  
24 was left to rest for at least 12 hours inside the glovebox.

## 25 **Characterizations**

26 For Raman spectroscopy and X-ray diffraction (XRD) characterization, an aliquot of the  
27 dispersion containing the ZrO<sub>2</sub> nanocrystals was withdrawn and dried as described in the  
28 methodology. For morphological characterization by X-ray diffraction (XRD), a  
29 Shimadzu XRD-6000 diffractometer with Cu-K $\alpha$  radiation ( $\lambda = 0.1541$  nm) generated at  
30 40 kV and 30 mA and monochromatized with a nickel filter was used.  $\theta$ -2 $\theta$  scans were  
31 performed with a scanning speed of  $2^\circ \cdot \text{min}^{-1}$ , an angular step of  $0.02^\circ$ , an acquisition time  
32 of 1 second, and a quartz sample holder. Raman spectra were obtained using a Witec  
33 alpha 300 confocal Raman microscope with a 20x objective lens, a laser energy of 2.33  
34 eV ( $\lambda = 532$  nm), and powdered samples deposited on a glass slide. Transmission electron  
35 microscopy images were acquired using a Talos F200C (Thermo Fisher Scientific)  
36 transmission electron microscope equipped with a field emission electron beam, an  
37 accelerating voltage of 200 kV, and a  $4k \times 4k$  CMOS camera that enables low-dose  
38 acquisitions and side-entry cryogenic sample holders. High-resolution TEM images were  
39 also acquired using a Titan Cubens (FEI) with an acceleration voltage of 300 kV and a  
40  $4x4k$  CMOS camera. Automated image acquisition software was used. Coulometric Karl  
41 Fischer titration was performed using a Metrohm 756 KF Coulometer equipped with a  
42 diaphragm-type generator electrode, and the reagent used was Merck Aquastar®  
43 CombiCoulomat fritless. UV-Vis measurements were conducted using a Cary 60  
44 UV-Vis spectrophotometer with a reflectance accessory for solid samples.

45 The experimental details, calculations, and other applied parameters are applied in the  
46 data treatment for each sample.

47 **Water fraction in benzyl alcohol by Karl Fischer coulometry titration:** The water  
48 fraction is determined in benzyl alcohol solutions by adding the mixture to conditioned  
49 Karl Fischer reagent. Additionally, benzyl alcohol was feasible to be measured by the

50 Aquastar® KF reagent. The experiments were conducted and are listed in Table S 1.

51 Notably, a quick analysis was performed after the container was opened for air exposure,

52 and a thin needle was used to minimize external water contamination. The fitting curve

53 ExpDecay1 **was** applied in the water absorption experiment shown in equation 1.

54

55 Table S 1: Water fraction determined by Karl Fischer coulometry and experimental  
 56 details.

| Experiment                                                             | Measured water fraction (ppm)                                                                                                                                                                                                                                                                                                                                                                                                                                                                           | Procedure and experiment details                                                                                                                                                                                                                                                                                                                                                                                                                                                                                                                                                                                                                                                                                                                                                                                                                                                                                                                                                      |
|------------------------------------------------------------------------|---------------------------------------------------------------------------------------------------------------------------------------------------------------------------------------------------------------------------------------------------------------------------------------------------------------------------------------------------------------------------------------------------------------------------------------------------------------------------------------------------------|---------------------------------------------------------------------------------------------------------------------------------------------------------------------------------------------------------------------------------------------------------------------------------------------------------------------------------------------------------------------------------------------------------------------------------------------------------------------------------------------------------------------------------------------------------------------------------------------------------------------------------------------------------------------------------------------------------------------------------------------------------------------------------------------------------------------------------------------------------------------------------------------------------------------------------------------------------------------------------------|
| Dried benzyl alcohol solution with molecular sieves                    | 39                                                                                                                                                                                                                                                                                                                                                                                                                                                                                                      | <ul style="list-style-type: none"> <li>500 mL of as-received benzyl alcohol was transferred to a container with 110 g of preactivated 3,5A molecular sieves inside a dried glovebox.</li> <li>The solution is to rest for over 2 weeks before its use.</li> </ul>                                                                                                                                                                                                                                                                                                                                                                                                                                                                                                                                                                                                                                                                                                                     |
| Maximum water saturation in benzyl alcohol                             | 90835                                                                                                                                                                                                                                                                                                                                                                                                                                                                                                   | <ul style="list-style-type: none"> <li>In a closed container, a 50% volume of water and a 50% volume of BnOH.</li> <li>The mixture was vigorously stirred and left resting for over a week to allow the complete phase separation and guarantee the water saturation in the benzyl alcohol phase.</li> <li>The water in the BnOH phase was collected by using a needle, cleaning the part exposed to the water phase, and being careful not to take water</li> </ul>                                                                                                                                                                                                                                                                                                                                                                                                                                                                                                                  |
| Maximum water absorbed from atmospheric air (55~85% relative humidity) | 3 weeks: 30535<br>2 <sup>nd</sup> month: 35050<br>9 <sup>th</sup> month: 32852<br>12 <sup>th</sup> month: 35522                                                                                                                                                                                                                                                                                                                                                                                         | <ul style="list-style-type: none"> <li>60 mL of benzyl alcohol in a short-form 100 mL beaker was exposed to atmospheric air for over a year.</li> <li>In the lab environment in a tropical climate under an air conditioner.</li> </ul>                                                                                                                                                                                                                                                                                                                                                                                                                                                                                                                                                                                                                                                                                                                                               |
| Time versus water absorption in a controlled environment               | <b>Dry (0 min, control 1): 283</b><br><b>1 min: 408</b><br><b>2 min: 473</b><br><b>4 min: 637</b><br><b>8 min: 861</b><br><b>16 min: 1281</b><br><b>32 min: 1610</b><br><b>64 min: 2182</b><br><b>240 min: 4033</b><br><b>Dry (control 1, let sealed in the glove bag for 240 min): 118</b><br><b>960 min (16 h): 6654</b><br><b>3840 min (64 h): 9768</b><br><b>21600 min (360 h): 33822</b><br><b>43200 min (720 h): 41146</b><br><b>Dry (control 2, let sealed in the glove bag for 720 h): 1222</b> | <ul style="list-style-type: none"> <li>2 mL of benzyl alcohol was added to an Eppendorf (exposed area is approximately 10 mm<sup>2</sup>). The air humidity was measured by the humidity device.</li> <li>The experiment was conducted inside a glove bag with 3 liters of KCl saturated solution.</li> <li>The Eppendorfs were opened, and the time to exposure was counted.</li> <li>They were closed in the given time exposure.</li> <li>On the second day (after 16 h, concerning the sample 960 min), all Eppendorf tubes were closed to take the first group out from the glovebag (all samples before 960 min and the group control 2).</li> <li>After that, the second group (over 24 h/1048 min) was taken back to the glovebag and just opened whenever the humidity inside reaches the average condition.</li> <li>When the experiment finished, over 1 month of exposure, those samples in the second group were characterized together with group control 3.</li> </ul> |

57 **Size from DRX:** Nanocrystal sizes were calculated from DRX data by the well-known

58 Scherrer equation; using the 50,3° peak center, FWHM parameters were calculated from

59 the Pseudo-Voight 1 fitting function, and the shape form was b=0,94 (for spherical and

60 quasispheroidal shapes).

61 **Crystalline phase from DRX:** The Rietveld refinements were performed in MAUD  
62 software and were compared with the *hkl* reflection positions and relative intensity  
63 diffraction for the monoclinic and cubic databases described in ICSD No. 18190 and No.  
64 72955, respectively. The fitting curves and their respective residuals are presented for  
65 each sample.

66 Table S 2: Refined parameters from powder XRD are listed as weight fractions (%), grain  
67 size (nm), microstrains ( $\epsilon$ ), lattice parameters, and statistical  $\chi^2$  and R-factor for m-ZrO<sub>2</sub>  
68 and c-ZrO<sub>2</sub> refinement statistics.

| Parameters                       |                            | Dry                 | 1k                  | 2k                  | 3k                 | 5k                 | 20k                | 40k           |        |
|----------------------------------|----------------------------|---------------------|---------------------|---------------------|--------------------|--------------------|--------------------|---------------|--------|
| Monoclinic (m-ZrO <sub>2</sub> ) | Phase composition (%)      | 83,3 ± 1,7          | 80,1 ± 1,4          | 54,4 ± 1,1          | 48,6 ± 0,7         | 25,8 ± 1,5         | 13,0 ± 1,3         | 44,3 ± 1,2    |        |
|                                  | Crystallite size (nm)      | 80,2 ± 1,8          | 75,6 ± 2,0          | 66,2 ± 1,3          | 61,0 ± 1,8         | 96 ± 14            | 73,5 ± 20          | 57,2 ± 1,3    |        |
|                                  | Microstrain ( $\epsilon$ ) | 0,0146 (4)          | 0,0108 (6)          | 0,0092 (3)          | 0,0092 (6)         | 0,012 (2)          | 0,007 (3)          | 0,0087 (9)    |        |
|                                  | Lattice parameter (Å)      | a = 5,168 (7)       | a = 5,151 (6)       | a = 5,146 (6)       | a = 5,134 (8)      | a = 5,15 (2)       | a = 5,07 (2)       | a = 5,287 (9) |        |
|                                  |                            | b = 5,155 (6)       | b = 5,172 (5)       | b = 5,133 (5)       | b = 5,139 (6)      | b = 5,20 (2)       | b = 5,13 (3)       | b = 5,127 (8) |        |
| c = 5,357 (6)                    |                            | c = 5,335 (4)       | c = 5,362 (4)       | c = 5,369 (6)       | c = 5,27 (2)       | c = 5,35 (2)       | c = 5,169 (8)      |               |        |
| $\beta$ = 99,395(7)              |                            | $\beta$ = 99,42 (5) | $\beta$ = 99,14 (8) | $\beta$ = 99,16 (9) | $\beta$ = 99,0 (2) | $\beta$ = 98,8 (4) | $\beta$ = 99,4 (1) |               |        |
| Cubic (c-ZrO <sub>2</sub> )      | Phase composition (%)      | 16,7 ± 1,5          | 19,8 ± 0,9          | 45,6 ± 1,1          | 51,3 ± 0,4         | 74,2 ± 1,6         | 87,0 ± 1,9         | 55,7 ± 1,3    |        |
|                                  | Crystallite size (nm)      | 75 ± 26             | 64 ± 2,9            | 58 ± 1,1            | 65 ± 1,4           | 53,9 ± 0,3         | 41,5 ± 0,4         | 50,162 ± 1,0  |        |
|                                  | Microstrain ( $\epsilon$ ) | 0,0051 (1)          | 0,0009 (1)          | 0,0056 (6)          | 0,0093 (4)         | 0,0061 (1)         | 0,0107 (6)         | 0,0131 (6)    |        |
|                                  | Lattice parameter (Å)      | a = 5,138 (3)       | a = 5,119 (3)       | a = 5,114 (1)       | a = 5,115 (2)      | a = 5,105 (3)      | a = 5,115 (3)      | a = 5,081 (2) |        |
| Statistics                       | $\chi^2$ ( $\zeta$ )       | 1,186               | 1,172               | 1,155               | 1,136              | 1,164              | 1,115              | 1,292         |        |
|                                  | R-factor (%)               | $R_b$               | 9,519               | 9,321               | 9,501              | 9,102              | 9,488              | 8,960         | 10,001 |
|                                  |                            | $R_{exp}$           | 10,363              | 10,310              | 10,758             | 10,562             | 10,475             | 10,397        | 10,143 |
|                                  |                            | $R_{wp}$            | 12,287              | 12,087              | 12,428             | 11,997             | 12,200             | 11,595        | 13,113 |

69  $R_{exp}$  = expected profile;  $R_{wp}$  = weighted profile;  $R_b$  = Bragg-R value

70 **Crystalline phase from RAMAN:** Due to the given symmetry of each crystalline phase,  
71 the group theory allows for the monoclinic, tetragonal, and cubic phases to show 18, 6,  
72 and 1 peaks in the RAMAN spectra, respectively. The RAMAN peak is listed for each  
73 sample in the tables below, and it is summarized in terms of the peak position and the  
74 normalized intensity.

75 (<10%) VW = Very weak;

76 (10~30%) W = Weak;

77 (30~50%) M = Medium;

78 (50~70%) S = Strong;

79 (>70%) VS = Very strong;

80 (Shoulder): This peak appears as a superposed peak, like a shoulder, beside another peak.

81 **Reaction yield:** The powders dispersed in chloroform were subjected to  
82 thermogravimetry at 700 °C, and the organic ligand fraction was discounted by the yield  
83 of the ZrO<sub>2</sub> nanocrystal reaction. The total mass of the ZrO<sub>2</sub> NC dispersion was weighed,  
84 and three aliquots of ethanol dispersion were used in the gravimetry calculation.

85 **Optical gap determination (related to the bandgap):** From the diffuse UV–Vis  
86 spectrograph characterization, the optical gap (bandgap) of the powder samples was  
87 calculated from the Tauc plot. This indicates the lowest-energy transition between the  
88 valence and conduction band, which was extrapolated from a linear part of the energy  
89 equal to zero. Furthermore, the direct allowed transition is considered in the Tauc plots.  
90 The percentage of diffuse reflectance for all the samples is presented in Figure S1:

91 Figure S1:  $(\alpha h\nu)^2$  plot from the UV–Vis spectra of powder samples synthesized with  
92 different water concentrations.

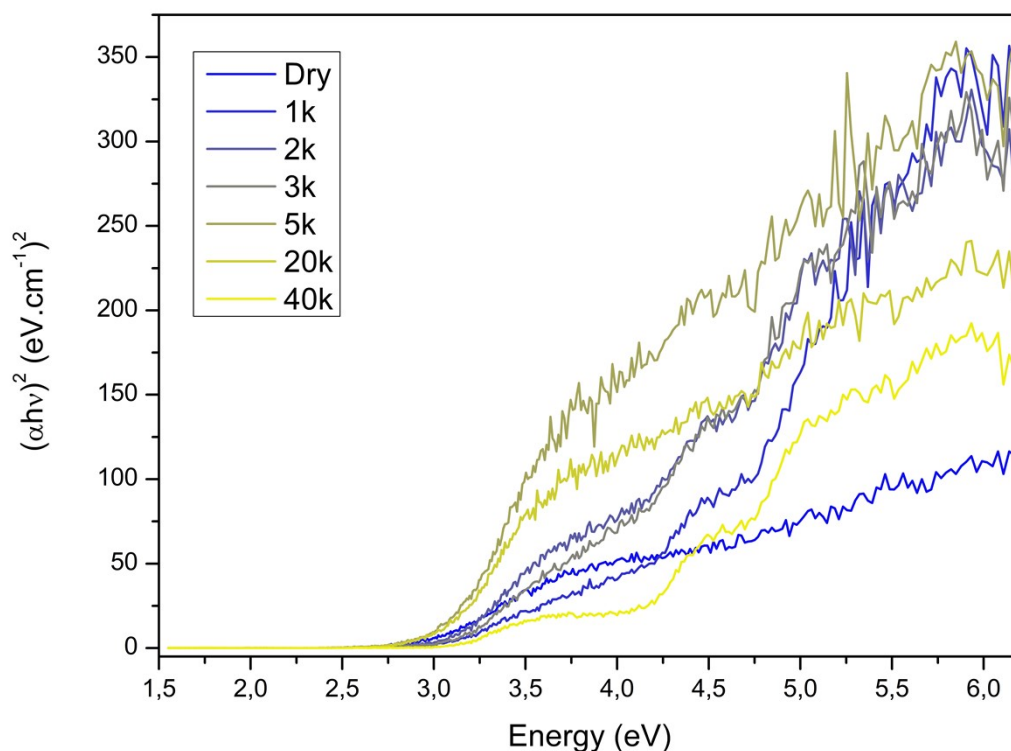

93

94

95 **Size and morphology from TEM images:** Transmission electron microscopy image is  
96 shown for each sample except the 2k and 40k samples. The particle counting was  
97 performed using ImageJ software. An ellipsoidal shape was used for all the samples. All  
98 the images taken were used for counting the samples.

99 The kernel smooth distribution curve was applied to estimate the maximum value of the  
100 aspect ratio distribution in the bins. [Freq.] = Relative frequency, counts of bins per total  
101 count. The peaks of bins in the aspect ratio, the central higher bin plus the vicinal bins,  
102 one bin after and one bin below the given center bin ( $\pm 1$  bin near the center bin).

103

104

105 **a) Dry (0k) samples:**

106 Figure S2: Plot of the final number of refinement cycles of the dry (0k) sample.

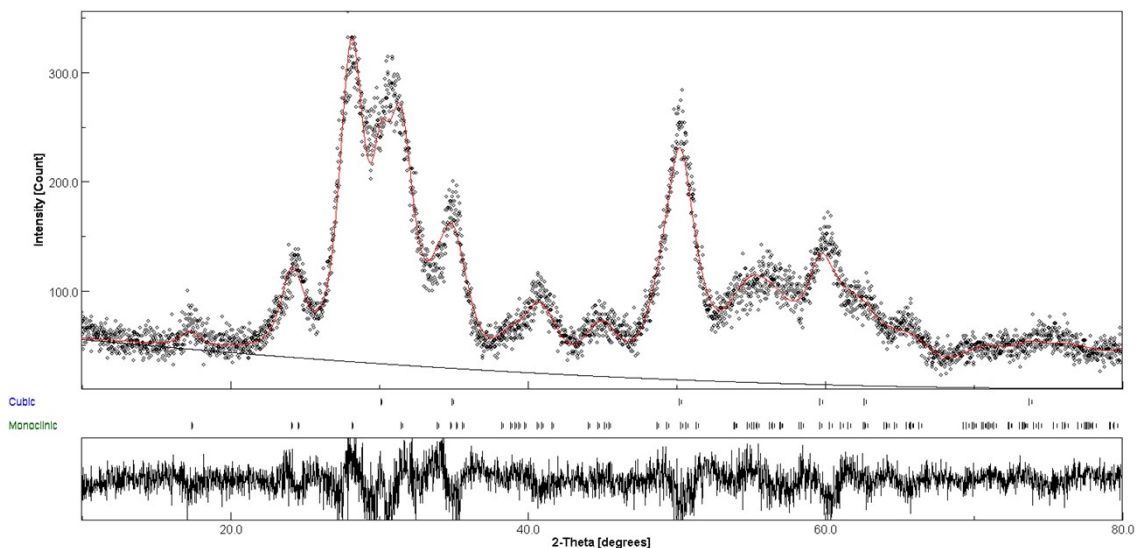

107

108

109 Table S 3: Raman shift peaks of dry (0k) samples and qualitative intensities.

| Raman peaks (Dry)       |                               |
|-------------------------|-------------------------------|
| <b>175 (m/t) – S</b>    | <b>473 (m/t) - VS</b>         |
| 207 (?) – VW            | 501 (m) – W (Shoulder)        |
| 240 (?) – VW            | <b>533 (m) - M</b>            |
| 269 (t) – VW            | <b>556 (m) - M</b>            |
| 307 (m) - VW            | <b>611 (m/c) - VS</b>         |
| 316 (t) – VW (Shoulder) | <b>642 (t) – M (Shoulder)</b> |
| <b>326 (m) - S</b>      | 669 (?) - W                   |
| <b>372 (m) - M</b>      |                               |

110 Figure S 3: Tauc plot method from diffuse reflectance UV–Vis spectroscopy of dry (0k)  
111 samples.

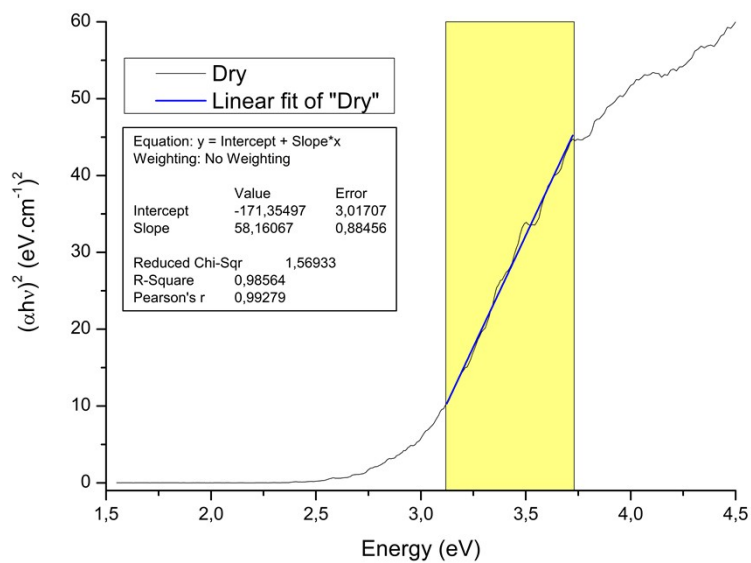

112

113 Figure S 4: Transmission electron microscopy images of the dry (0k) sample shown in  
114 a) and their respective length and width from 301 total counts b) and with roundness in  
115 c).  
116 a)

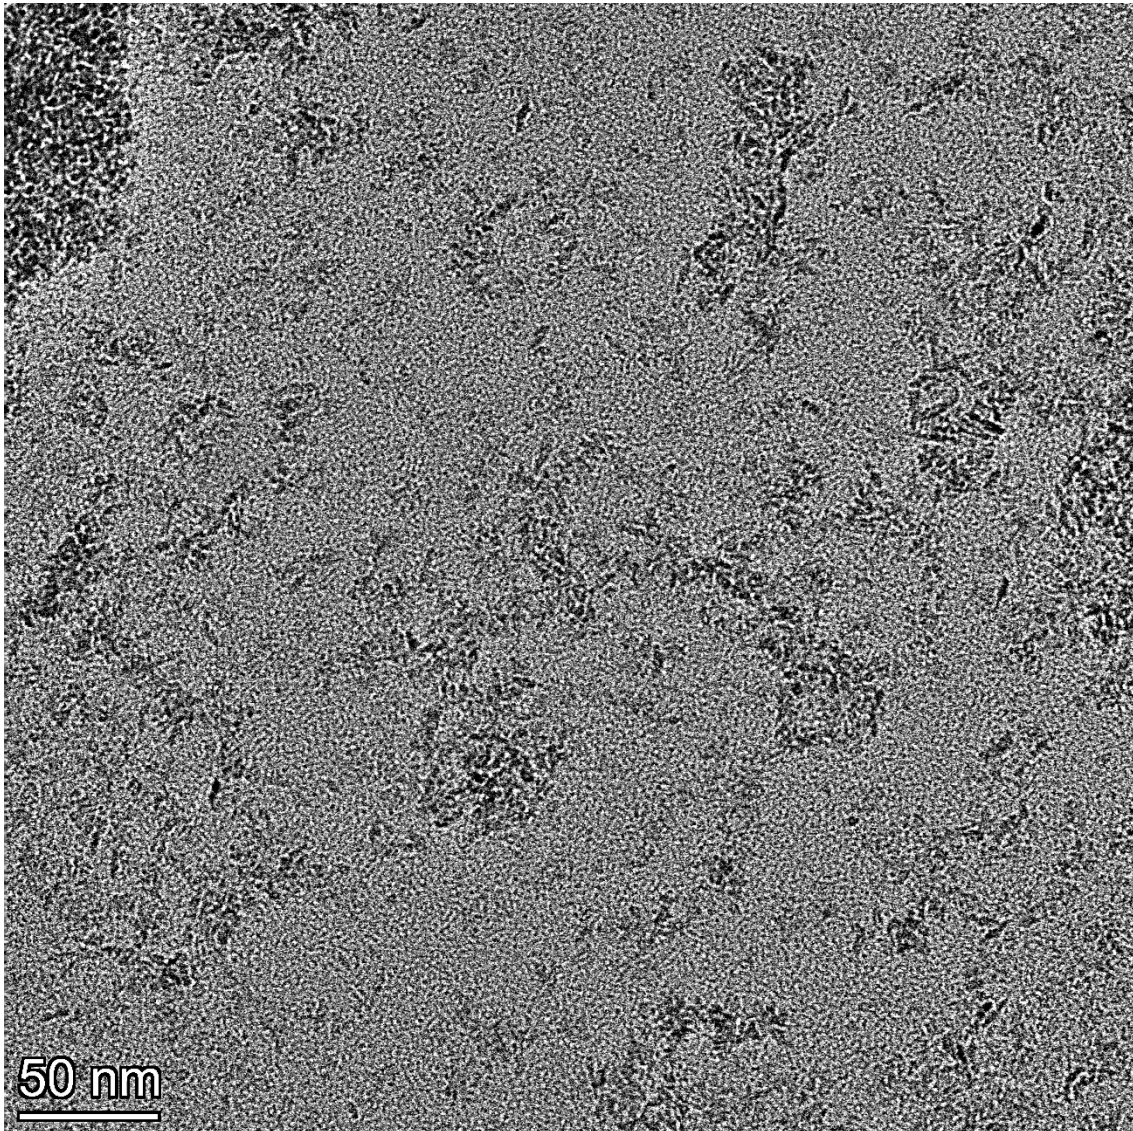

b)

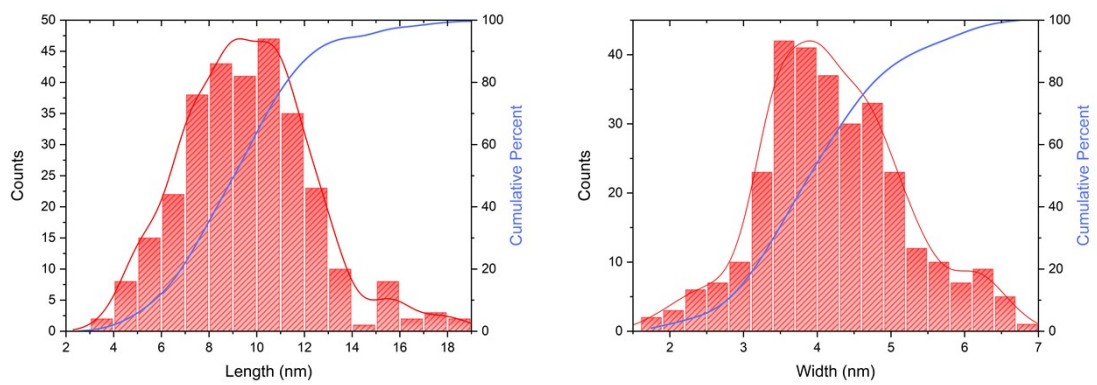

119

120

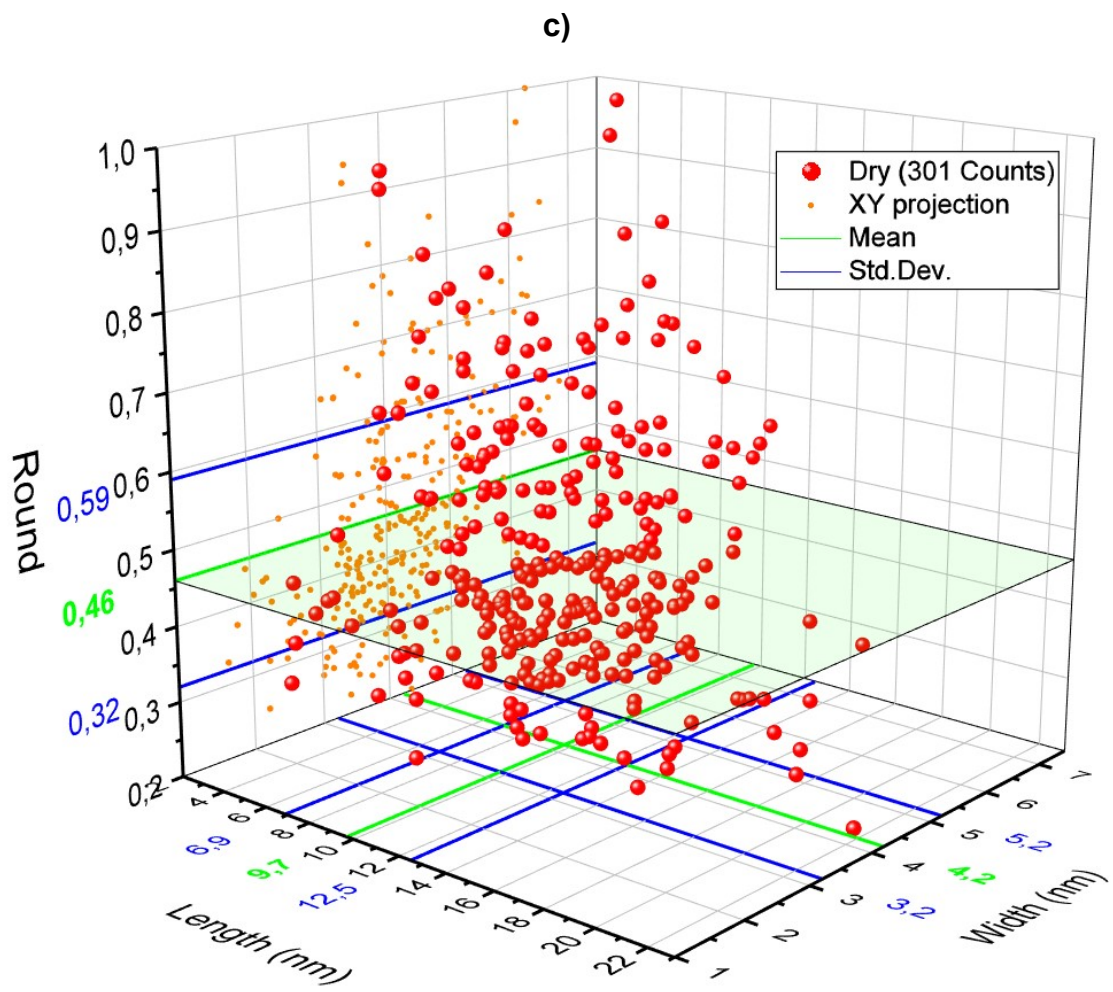

121

122

123 **b) 1,000 ppm (1k) samples**

124 Figure S 5: Plot of the final number of refinement cycles for the 1,000 ppm (1k) sample.

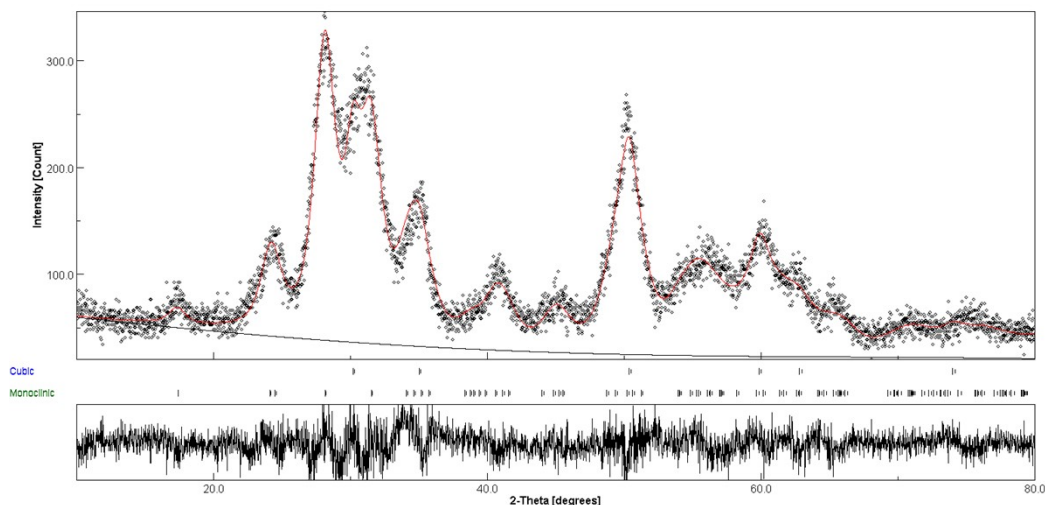

125

126 Table S 4: Raman shift peaks of 1,000 ppm (1k) samples and qualitative intensities.

| Raman peaks (1k)              |                               |
|-------------------------------|-------------------------------|
| <b>175 (m/t) – S</b>          | 502 (m) - W                   |
| 207 (m) - W                   | <b>529 (m) – M</b>            |
| 250 (?) – W                   | <b>556 (m) - M</b>            |
| <b>265 (t) - S</b>            | 570 (t) – W (Shoulder)        |
| <b>302 (m) – M (Shoulder)</b> | <b>611 (m/c) - VS</b>         |
| <b>325 (m) - S</b>            | <b>642 (t) - M (Shoulder)</b> |
| <b>372 (m) - M</b>            | 669 (?) - W                   |
| <b>473 (m/t) - VS</b>         |                               |

127

Figure S 6: Tauc plot method for the 1,000 ppm (1k) sample obtained by UV–Vis spectroscopy.

128

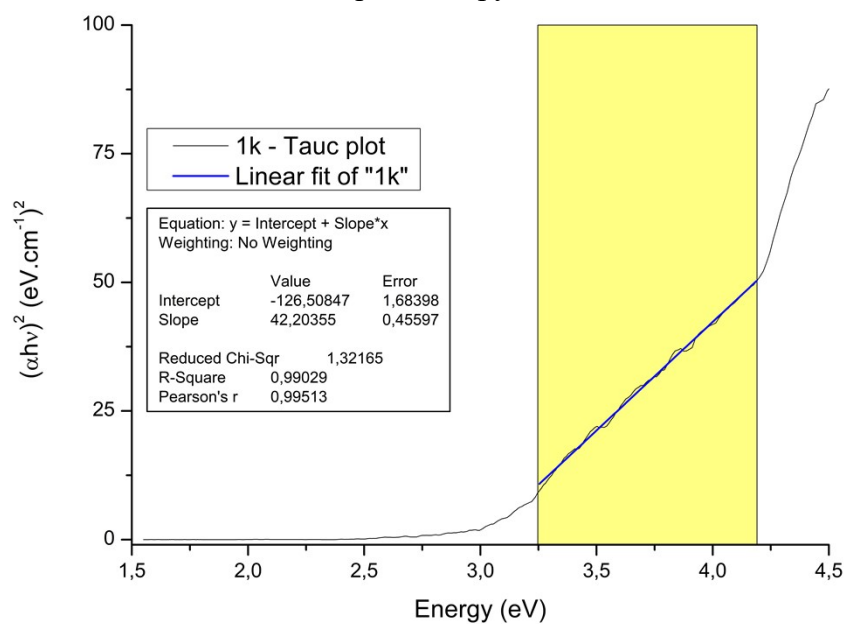

129

130

131 Figure S 7: Transmission electron microscopy images of the 1k sample shown in a) and  
132 their respective length and width from 63 total counts b).

133

a)

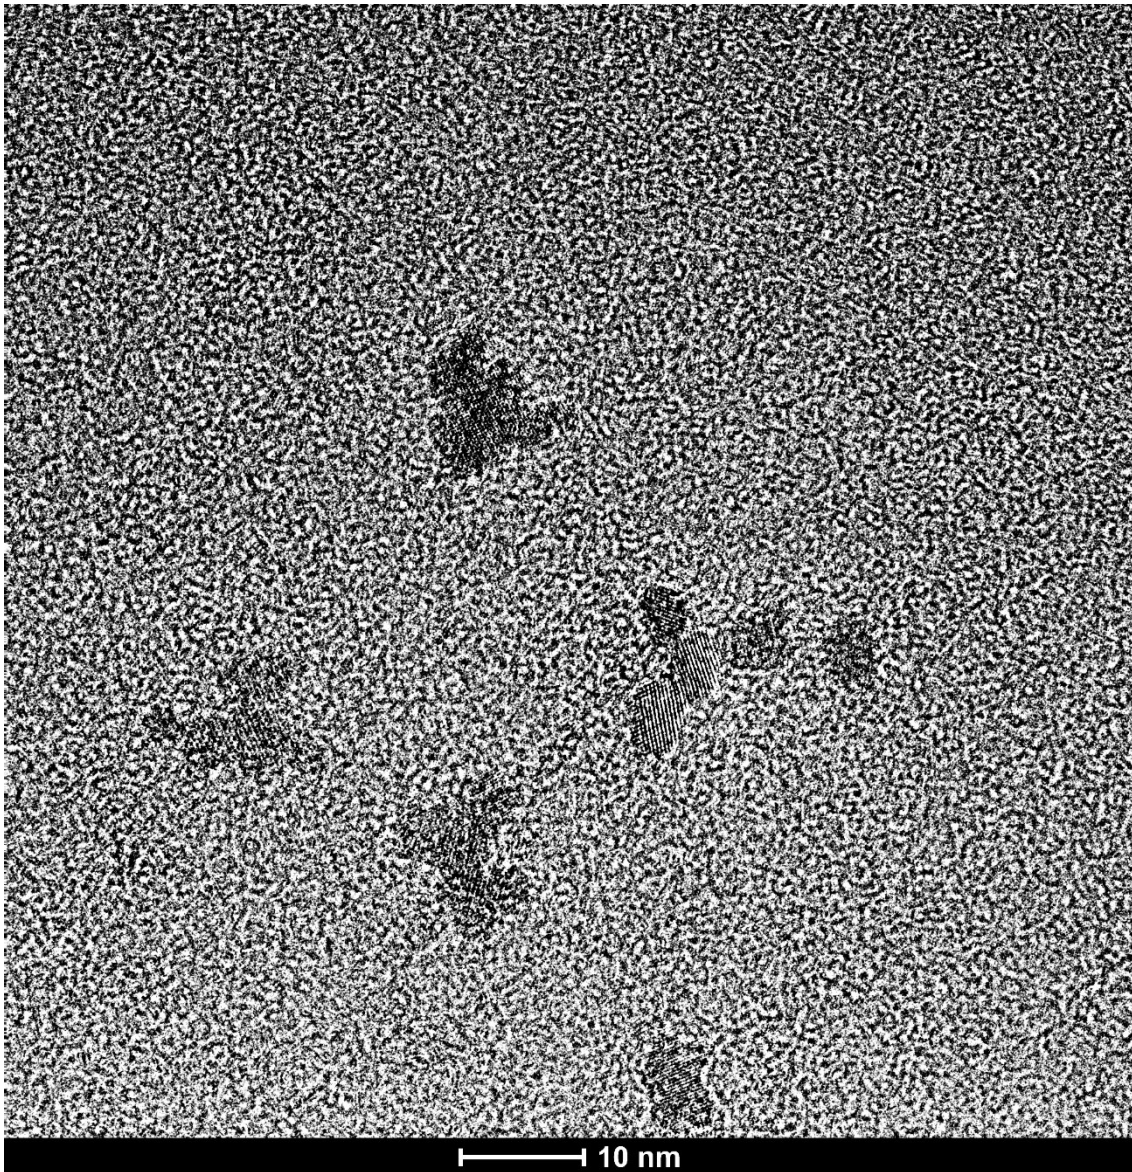

b)

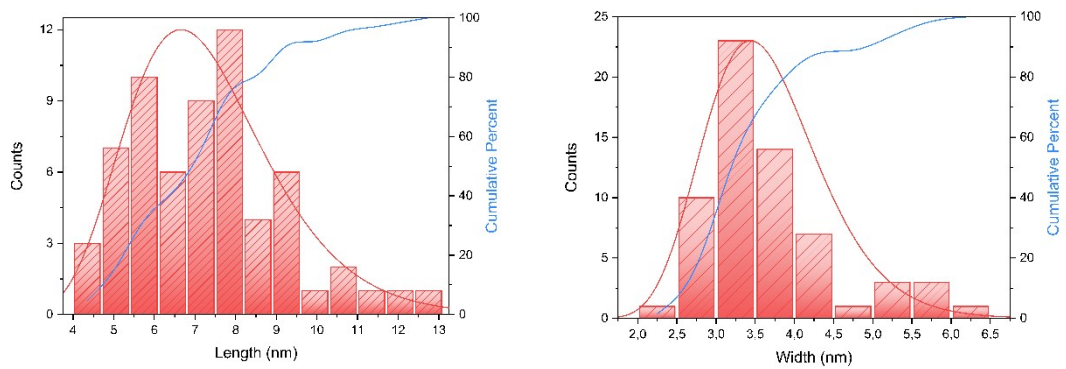

135 **c) 2,000 ppm (2k) samples:**

136 Figure S 8: Plot of the final refinement cycles of the 2,000 ppm (2k) sample.

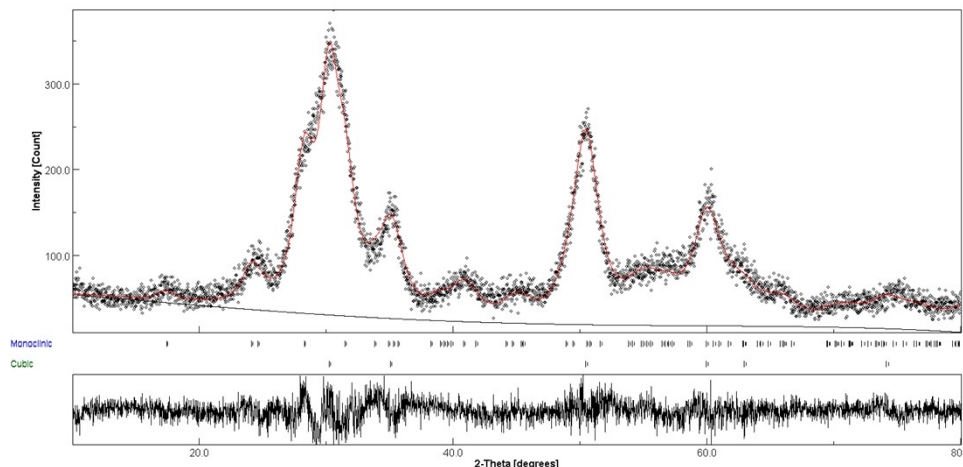

137

138 Table S 5: Raman shift peaks of 2,000 ppm (2k) samples and qualitative intensities.

| Raman peaks (2k)             |                              |
|------------------------------|------------------------------|
| <b>175 (m/t) – S</b>         | <b>473 (m/t) – VS</b>        |
| 208 (m) - VW                 | 496 (m) - W                  |
| 245 (?) – W                  | <b>528 (m) - M</b>           |
| 269 (t) – W                  | <b>561 (m) – M</b>           |
| <b>302 (m) – S (Sholder)</b> | 588 (t) – W (Sholder)        |
| <b>316 (t) - VS</b>          | <b>611 (m/c) - VS</b>        |
| <b>372 (m) – M</b>           | <b>642 (t) – S (Sholder)</b> |
| 400 (?) – VW                 | 669 (?) - W                  |
| 450 (t) – W (Sholder)        |                              |

139

140 Figure S 9: Tauc plot method from UV–Vis spectroscopy of a 2,000 ppm (2k) sample.

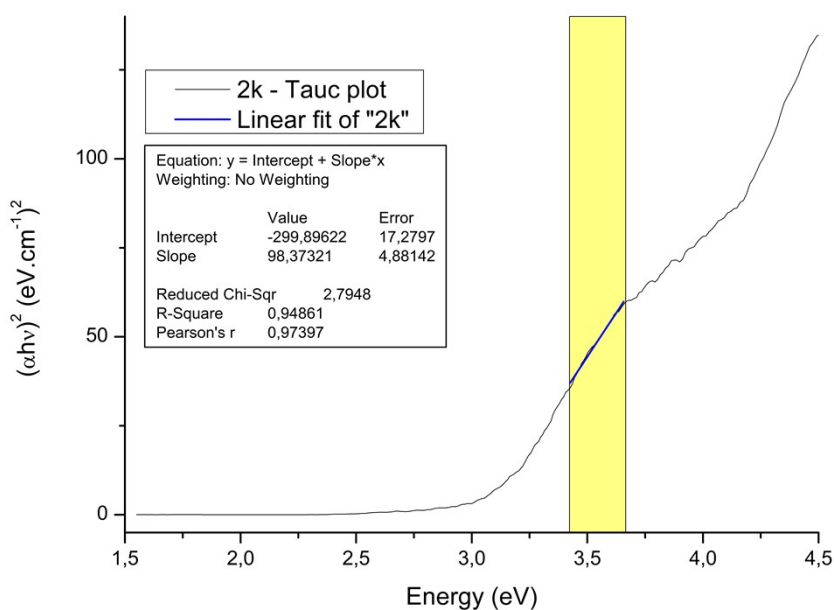

141

142 **d) 3,000 ppm (3k) sample:**

143 Figure S 10: Plot of final refinement cycles of the 3,000 ppm (3k) sample.

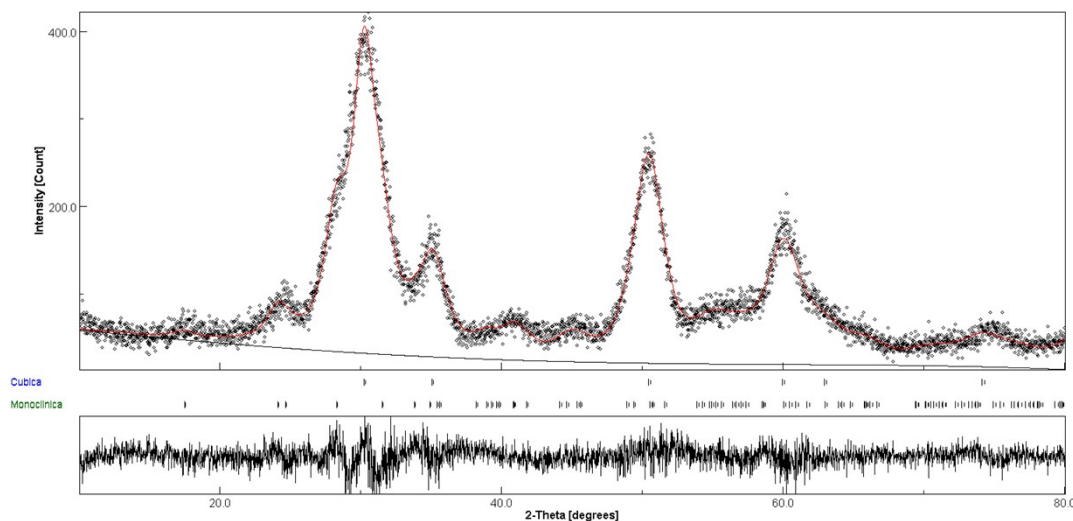

144

145 Table S 6: Raman shift peaks of 3,000 ppm (3k) samples and qualitative intensities.

| Raman peaks (3k)       |                               |
|------------------------|-------------------------------|
| <b>175 (m/t) – S</b>   | <b>473 (m/t) – VS</b>         |
| 207 (m?) - W           | <b>502 (m) – M (Shoulder)</b> |
| 246 (?) – W (Shoulder) | <b>528 (m) – M</b>            |
| 265 (t) – W            | <b>561 (m) - M</b>            |
| <b>302 (m) – M</b>     | <b>570 (t) – M (Shoulder)</b> |
| 316 (t)                | <b>611 (m/c) - VS</b>         |
| 372 (m) – W            | <b>642 (t) – S (Shoulder)</b> |
| 404 (?) - VW           | 669 (?) – W (Shoulder)        |
| 450 (t) – W (Shoulder) |                               |

146

147 Figure S 11: Tauc plot method from UV–Vis spectroscopy of a 3,000 ppm (3k) sample.

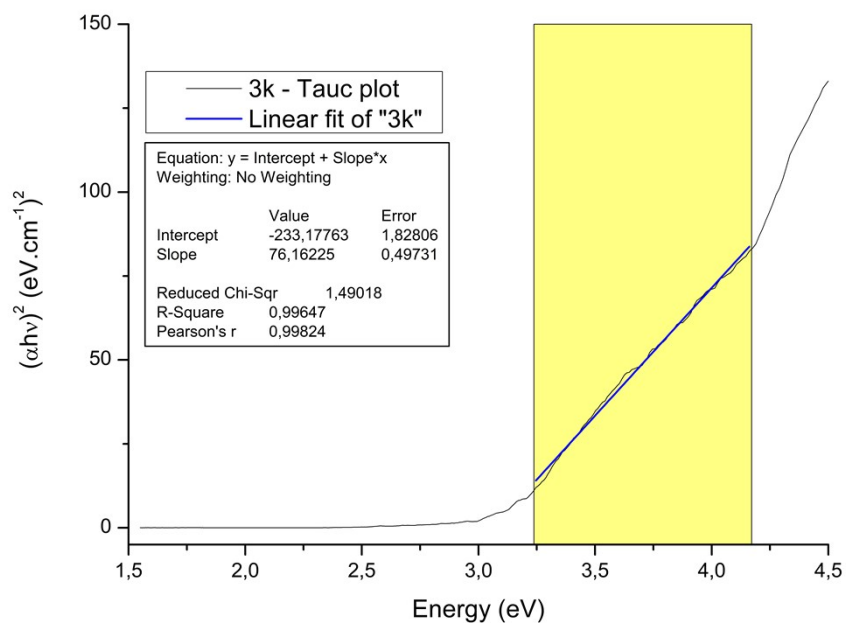

148

149 Figure S 12: Transmission electron microscopy images shown in a) and their respective  
150 lengths and widths from 160 total counts b).

151

a)

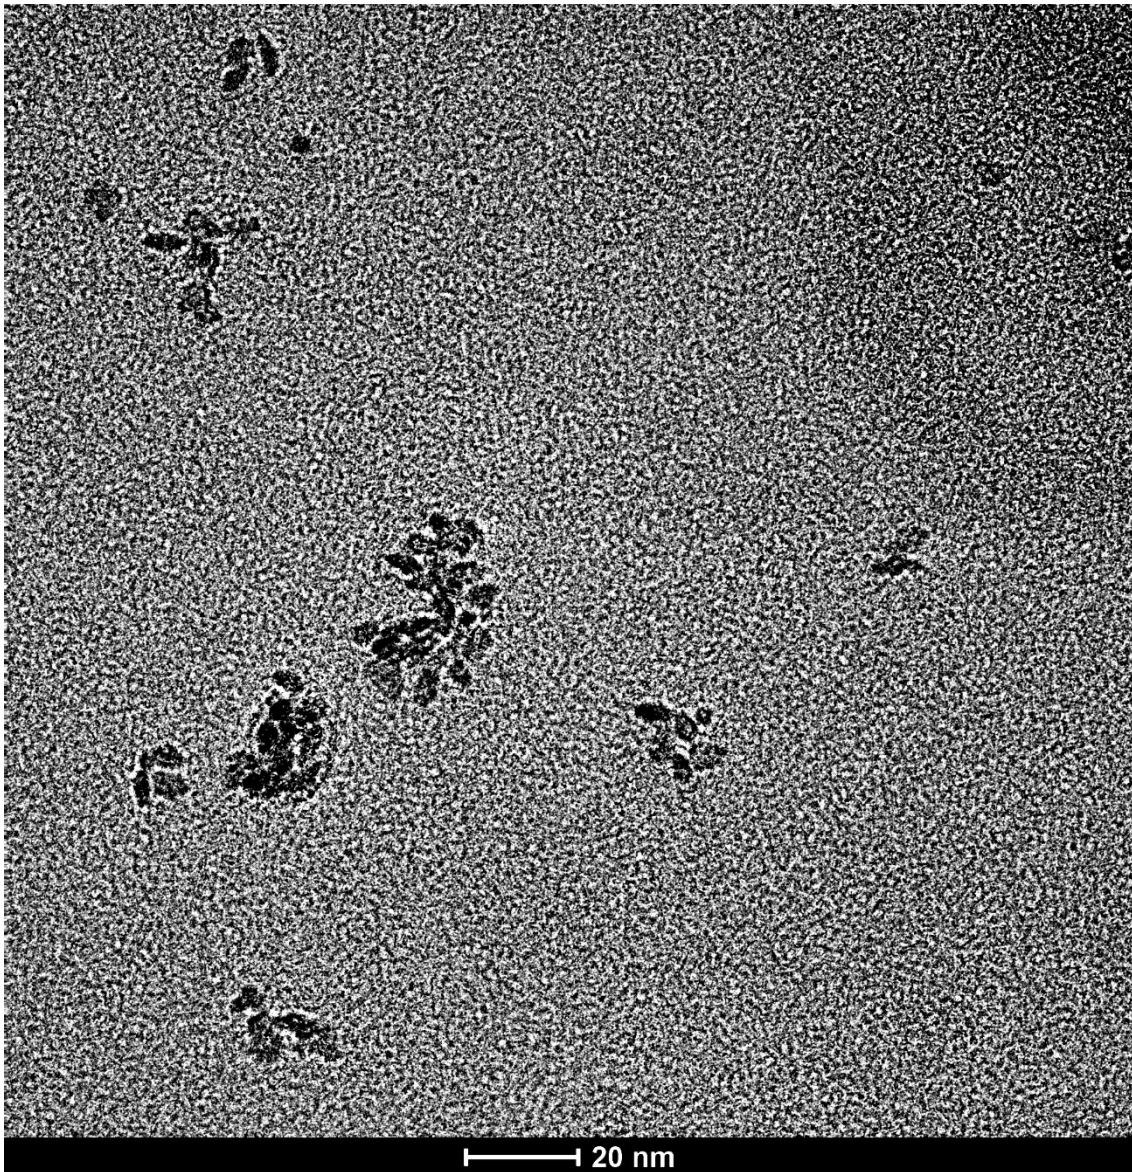

b)

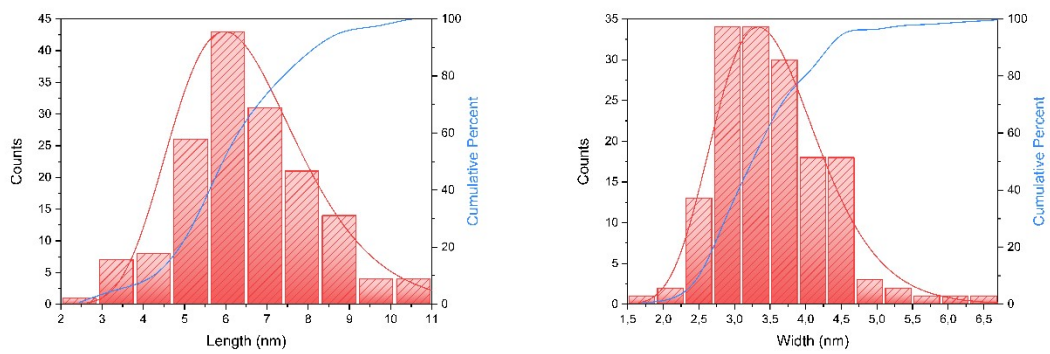

153 e) 5,000 (5k) sample:

154 Figure S 13: Plot of the final refinement cycles of the 5,000 ppm (5k) sample.

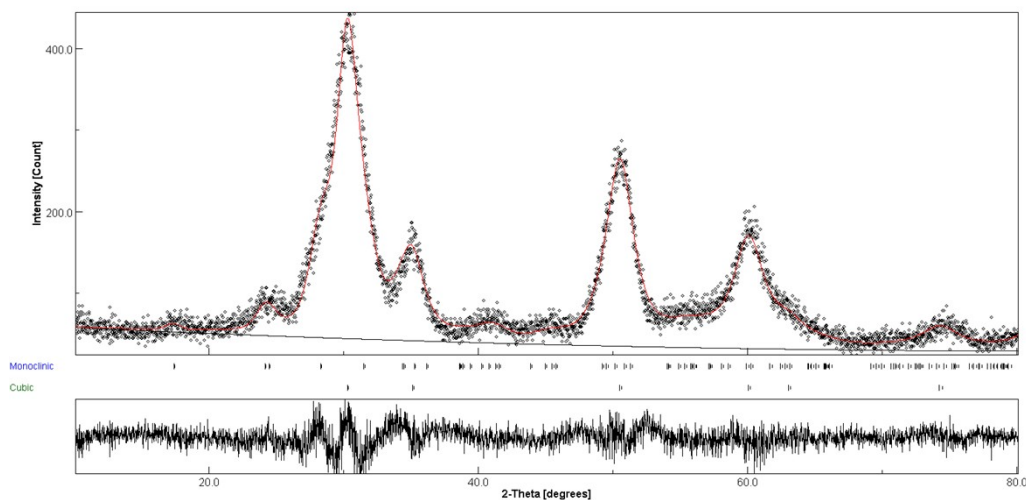

155

156 Table S7: Raman shift peaks of 5,000 ppm (5k) samples and qualitative intensities.

| Raman peaks (5k) |                         |
|------------------|-------------------------|
| 179 (m/t) – S    | 501 (m) – VW (Shoulder) |
| 278 (t) – M      | 533 (m) - W             |
| 320 (t) -S       | 556 (m) – W             |
| 376 (m) - W      | 579 (t) – S (Shoulder)  |
| 404 (m) - VW     | 615 (m/c) – VS          |
| 473 (m/t) – VS   | 642 (t) – VS (Shoulder) |

157

158 Figure S 14: Tauc plot method from UV–Vis spectroscopy of a 5,000 ppm (5k) sample.

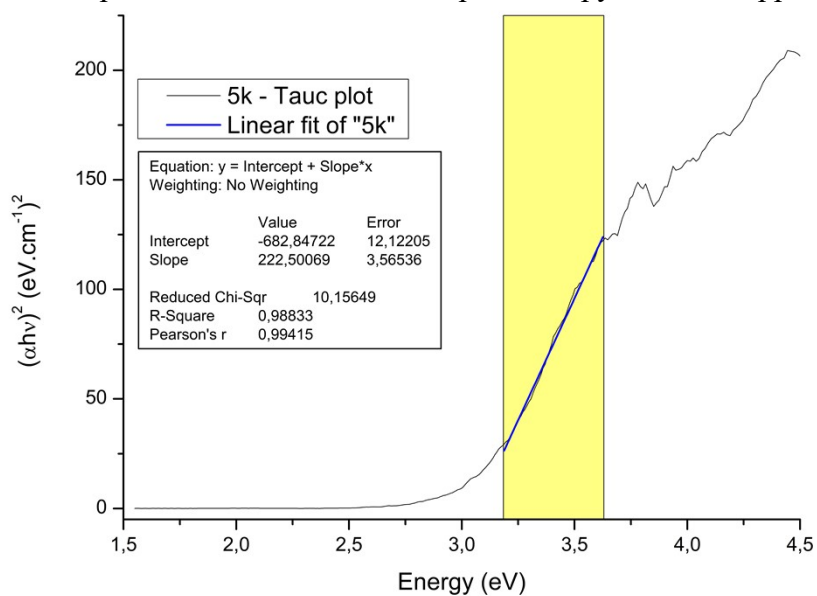

159

160

161 Figure S 15: Transmission electron microscopy images shown in a), and their respective  
162 lengths and widths from 301 total counts in b) and with roundness in c)  
163

a)

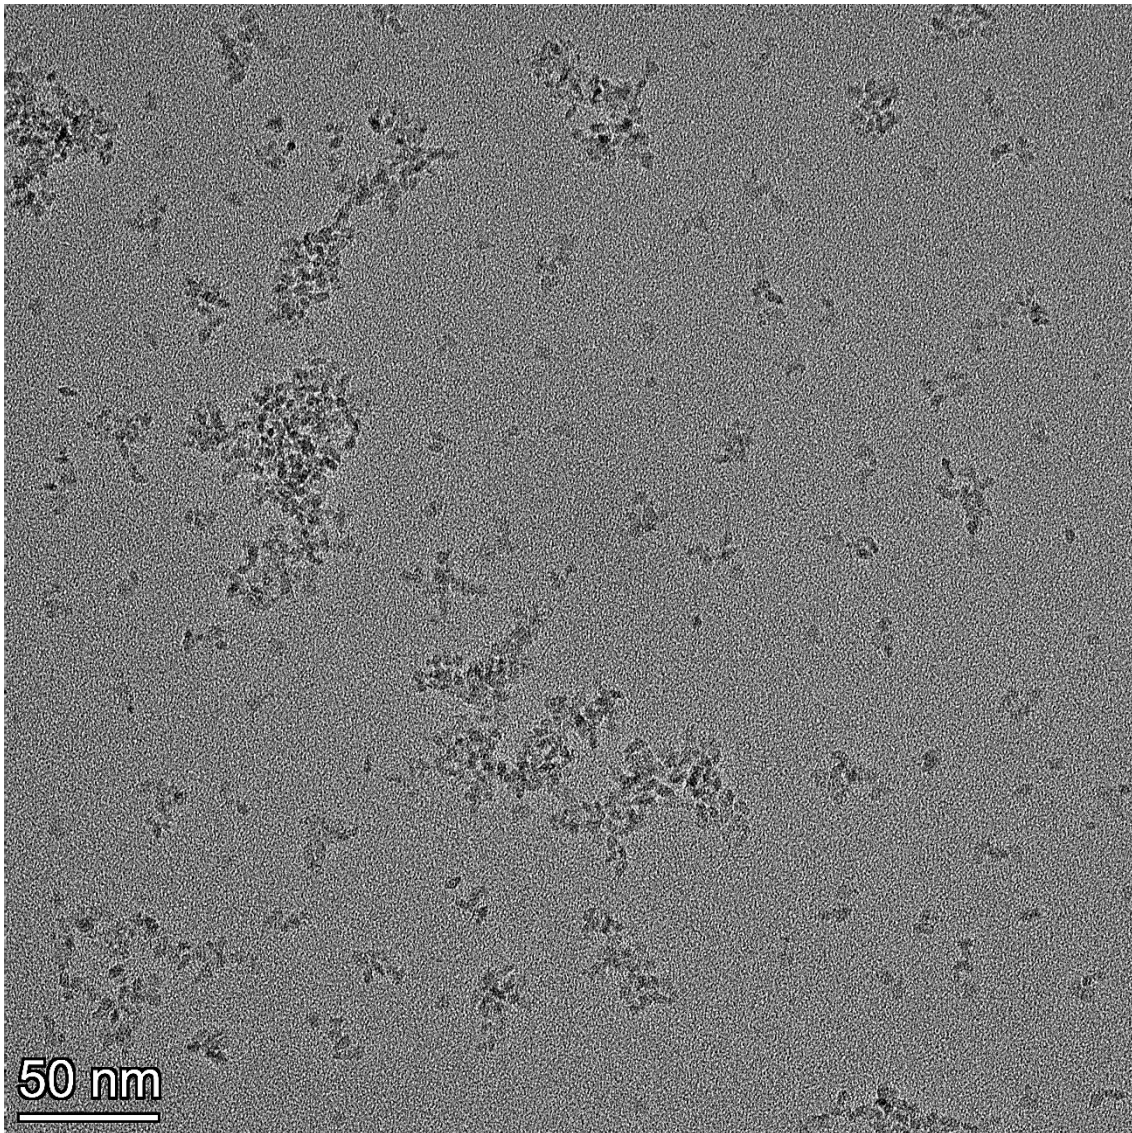

b)

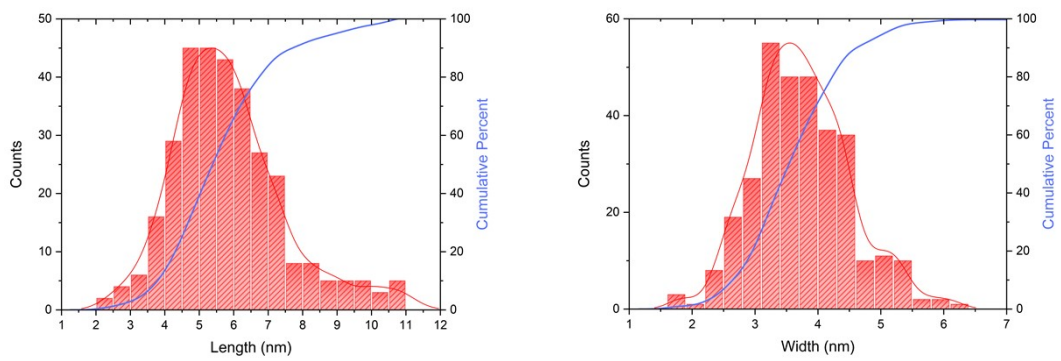

167

c)

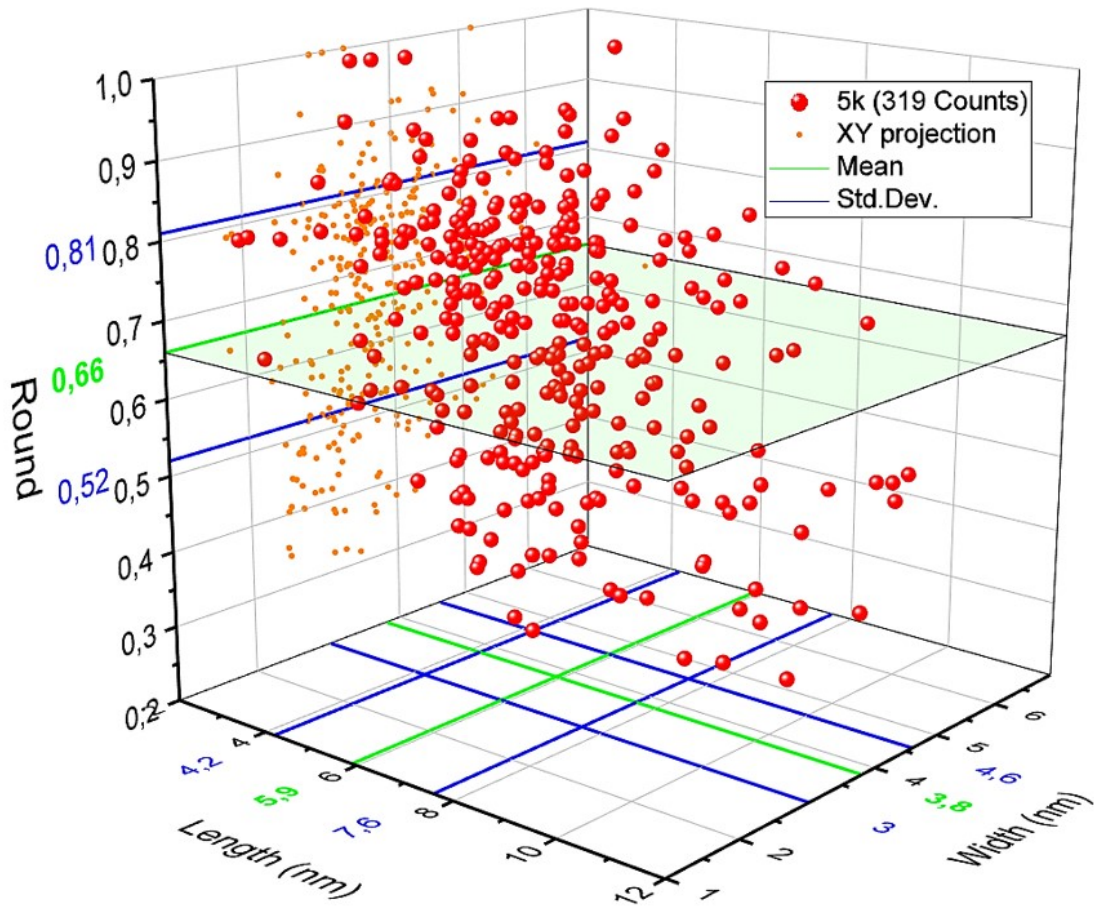

168

169

170

171 **f) 20,000 ppm (20k) sample:**

172 Figure S 16: Plot of final refinement cycles of the 20,000 ppm (20k) sample.

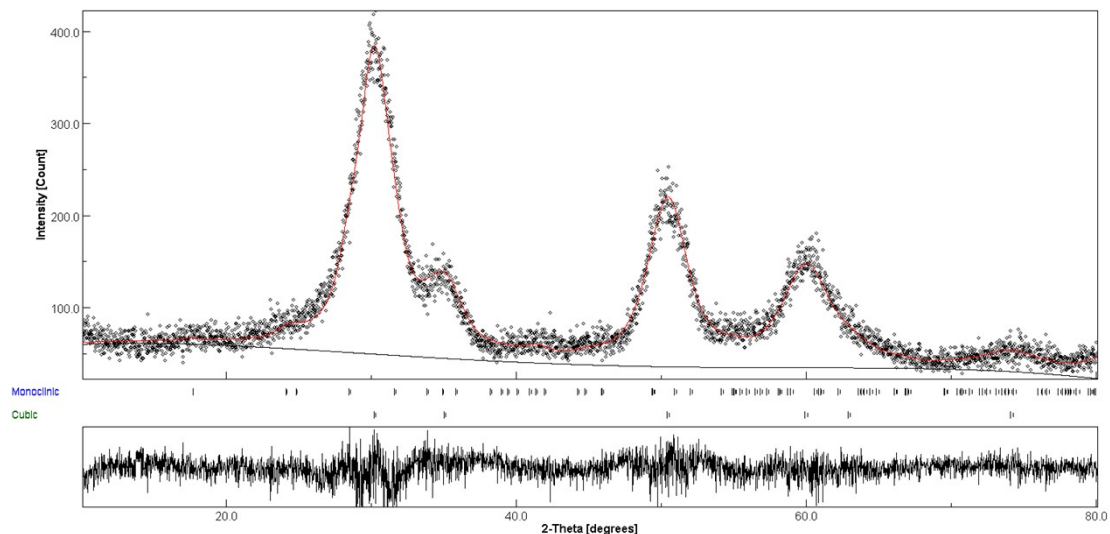

173

174 Table S 7: Raman shift peaks of 20,000 ppm (20k) samples and qualitative intensities.

| Raman peaks (20k)       |                          |
|-------------------------|--------------------------|
| 169 (m/t) – M           | 450 (t) – W (Shoulder)   |
| 246 (?)                 | <b>473 (m/t) - M</b>     |
| 265 (t) – W             | 502 (m) - W              |
| 302 (m) – W             | 533 (m) – W (Shoulder)   |
| 325 (?) – W (Shoulder)  | 561 (m) - W              |
| 372 (m) – VW            | <b>611 (m/c) - VS</b>    |
| 395 (m) – VW            | 642 (m/t) – W (Shoulder) |
| 437 (?) – VW (Shoulder) | 669 (?) – W (Shoulder)   |

175

176 Figure S 17: Tauc plot method from UV–Vis spectroscopy of a sample at 20,000 ppm  
177 (20k).

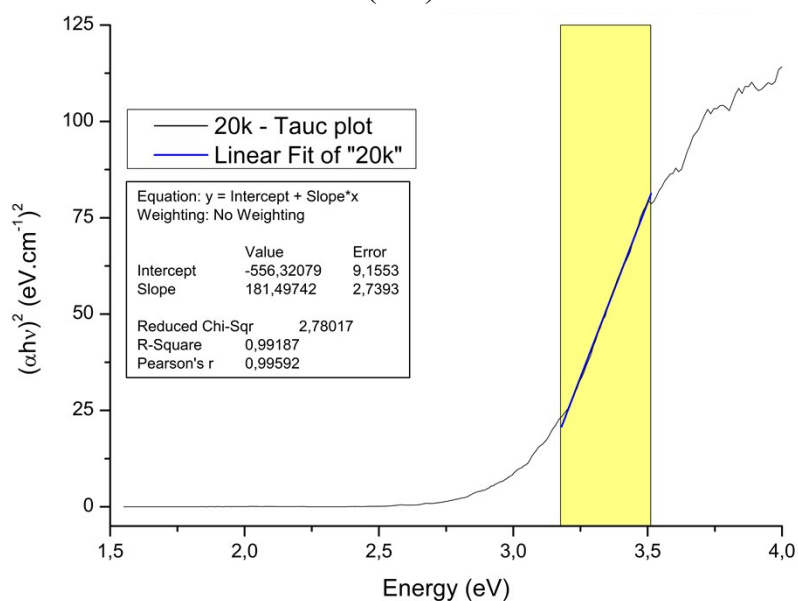

178

179

180 Figure S 18: Transmission electron microscopy images shown in a) and their respective  
181 lengths and widths from 408 total counts b) and with roundness in c).

182

a)

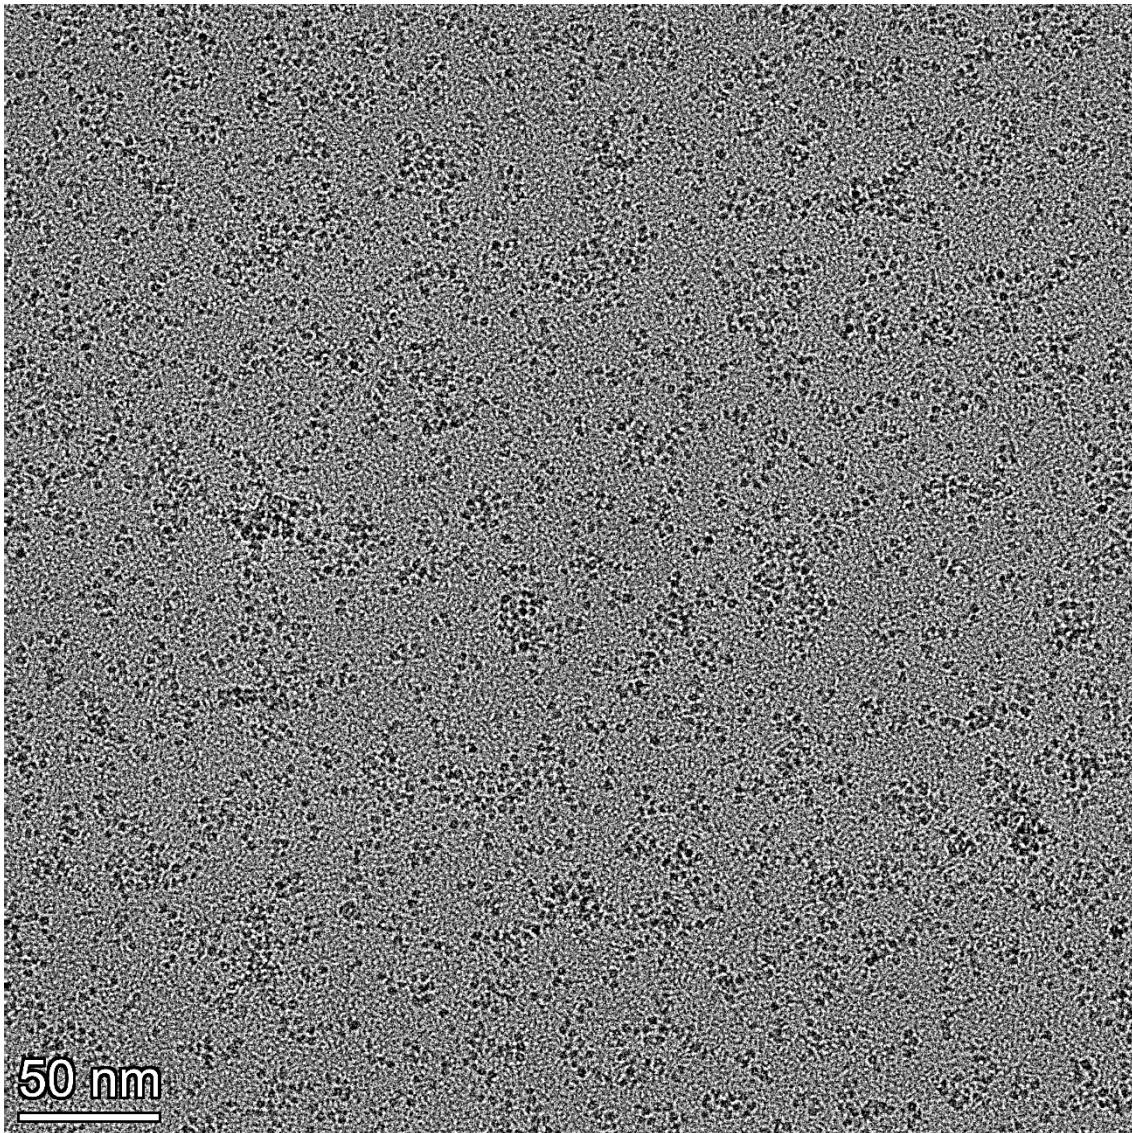

183

b)

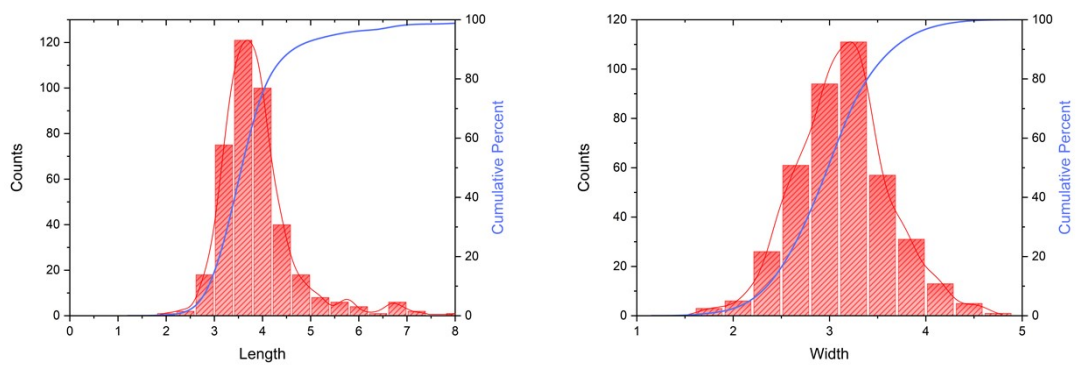

184

185

186

c)

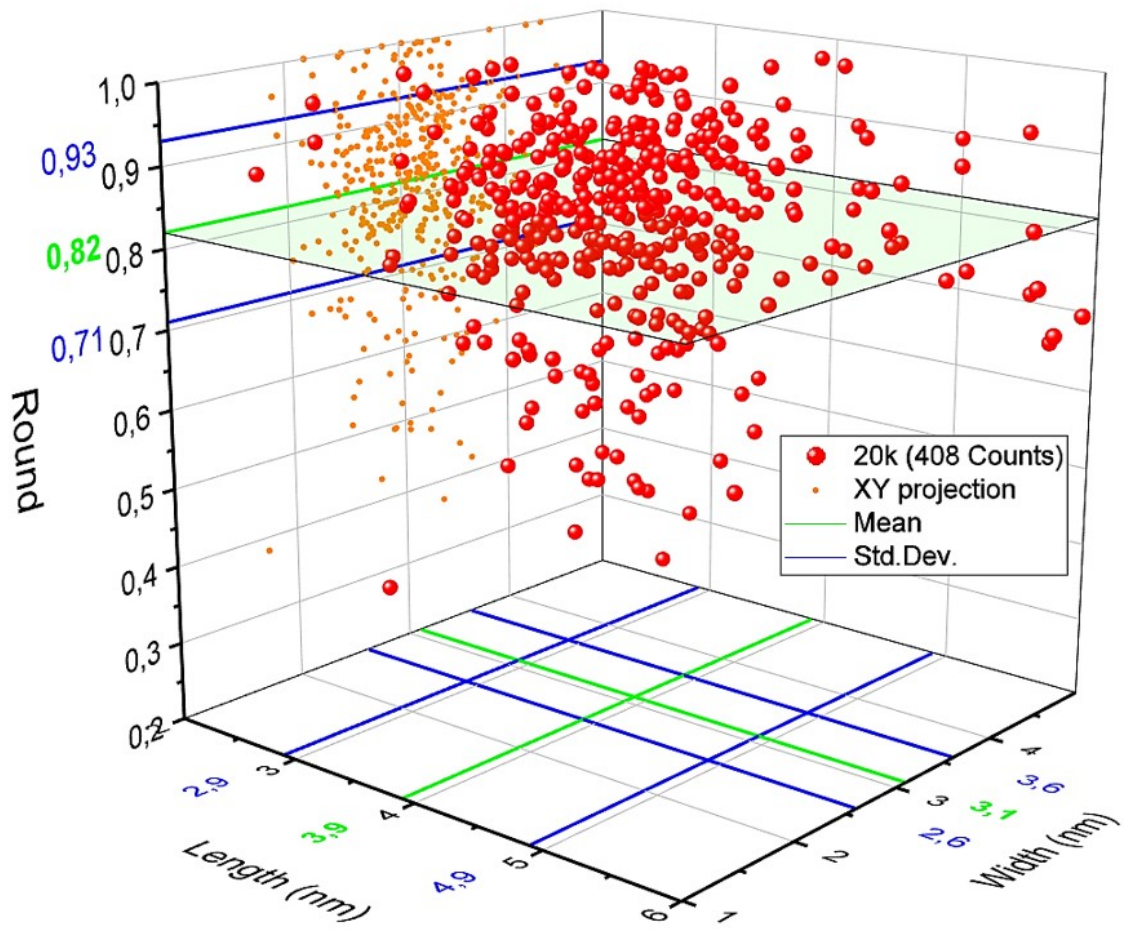

187

188

189 **g) 40,000 ppm (40k) sample:**

190 Figure S 19: Plot of the final number of refinement cycles for the 40,000 ppm (40k)  
 191 sample.

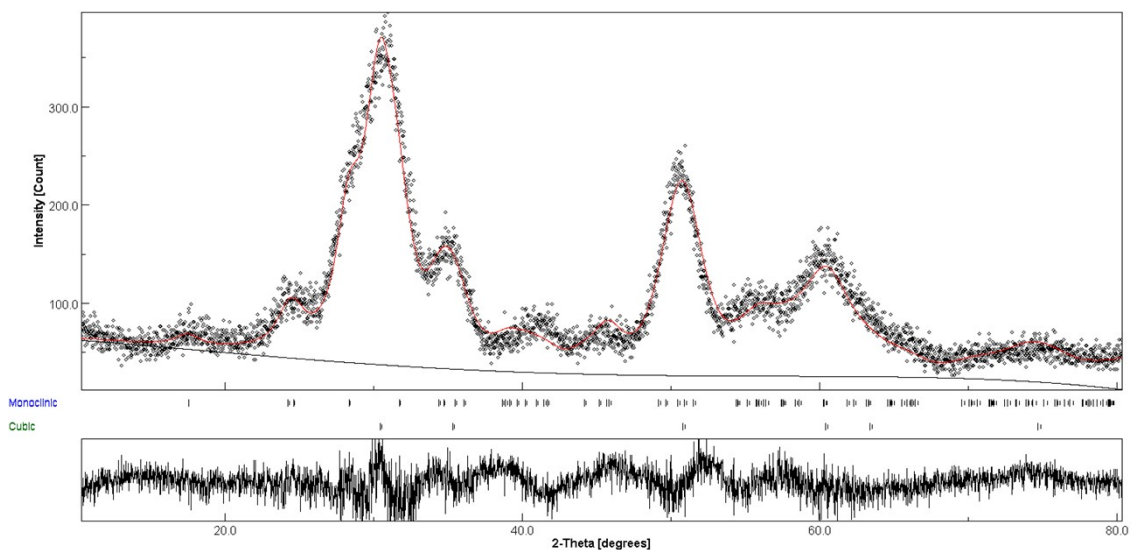

192

193

194 Table S 8: Raman shift peaks of 40,000 ppm (40k) samples and qualitative intensities.

| <b>Raman peaks (40k)</b> |                        |
|--------------------------|------------------------|
| <b>175 (m/t) - S</b>     | 400 (?) – W (Shoulder) |
| 203 (m?) – VW (Shoulder) | 455 (t) – W (Shoulder) |
| 246 (?) – VW (Shoulder)  | <b>473 (m/t) – S</b>   |
| 265 (t) - M              | 528 (m) – W            |
| 302 (m) – W (Shoulder)   | 561 (m) - W            |
| <b>316 (t) - M</b>       | <b>611 (m/c) - VS</b>  |
| <b>372 (m) - M</b>       | 642 (t) – W (Shoulder) |

195

196  
197

Figure S 20: Tauc plot method from UV-Vis spectroscopy of the 40,000 ppm (40k) sample.

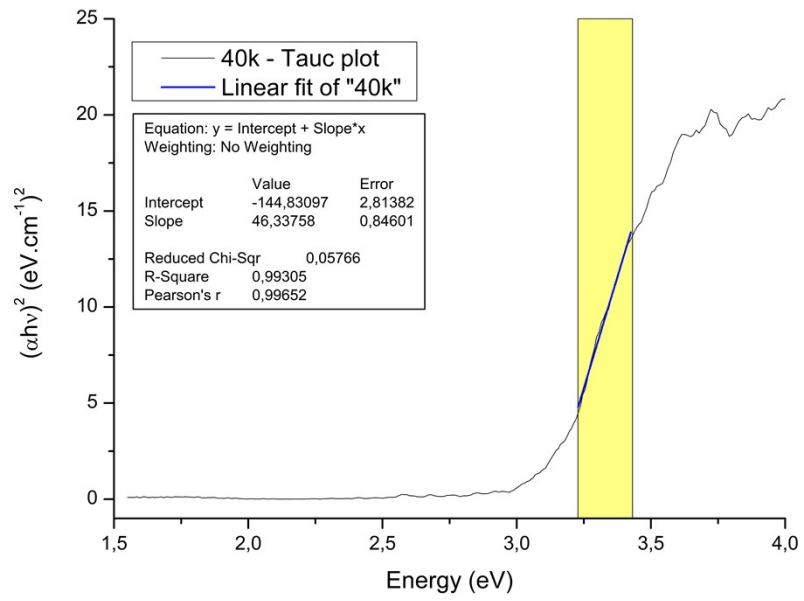

198
